# Supplementary material for: Differential transcriptome analysis reveals insight into monosymmetric corolla development of the crucifer Iberis amara
Source: PubMed Central journal article supplement (PMC4245847; doi:10.1186/s12870-014-0285-4), 2014-11-19
Supplement: 12870_2014_285_MOESM5_ESM.pdf [file 12870_2014_285_MOESM5_ESM.pdf]

| Target genes of | AGI Code  | laTCP1 | TCP1 | CYC | aDaxial petals<br>( <i>I. amara</i> ) | Annotation                                                         |
|-----------------|-----------|--------|------|-----|---------------------------------------|--------------------------------------------------------------------|
| laTCP1          | AT1G02790 | -      | 0    | 0   | 5,04                                  | polygalacturonase 4                                                |
| laTCP1          | AT2G26450 | -      | 0    | 0   | 5,69                                  | <b>Plant invertase/pectin methylesterase inhibitor superfamily</b> |
| laTCP1          | AT3G62170 | -      | 0    | 0   | 3,70                                  | <b>VANGUARD 1 homolog 2</b>                                        |
| laTCP1          | AT5G07430 | -      | 0    | 0   | 4,98                                  | <b>Pectin lyase-like superfamily protein</b>                       |
| laTCP1          | AT1G54070 | -      | 0    | 0   | 4,77                                  | Dormancy/auxin associated family protein                           |
| laTCP1          | AT4G27440 | -      | 0    | 0   | 2,23                                  | protochlorophyllide oxidoreductase B                               |
| laTCP1          | AT5G47000 | -      | 0    | 0   | 4,85                                  | Peroxidase superfamily protein                                     |
| laTCP1          | AT3G20530 | -      | 0    | 0   | 4,04                                  | Protein kinase superfamily protein                                 |
| laTCP1          | AT5G16500 | -      | 0    | 0   | 4,59                                  | Protein kinase superfamily protein                                 |
| laTCP1          | AT2G43230 | -      | 0    | 0   | 5,15                                  | Protein kinase superfamily protein                                 |
| laTCP1          | AT4G03290 | -      | 0    | 0   | 4,62                                  | EF hand calcium-binding protein family                             |
| laTCP1          | AT3G25170 | -      | 0    | 0   | 4,77                                  | ralf-like 26                                                       |
| laTCP1          | AT5G50790 | +      | 0    | 0   | 8,40                                  | Nodulin MtN3 family protein                                        |
| laTCP1          | AT1G73220 | -      | 0    | 0   | 4,26                                  | organic cation/carnitine transporter1                              |
| laTCP1          | AT4G35180 | -      | 0    | 0   | 3,53                                  | LYS/HIS transporter 7                                              |
| laTCP1          | AT2G26490 | -      | 0    | 0   | 19,89                                 | Transducin/WD40 repeat-like superfamily protein                    |
| laTCP1          | AT5G14890 | -      | 0    | 0   | 4,17                                  | NHL domain-containing protein                                      |
| laTCP1          | AT1G25240 | -      | 0    | 0   | 6,70                                  | ENTH/VHS/GAT family protein                                        |
| laTCP1          | AT1G02070 | -      | 0    | 0   | 4,37                                  | protein coding                                                     |
| laTCP1          | AT1G19500 | -      | 0    | 0   | 4,24                                  | protein coding, 0                                                  |
| laTCP1          | AT1G47280 | -      | 0    | 0   | 3,28                                  | no annotation                                                      |
| laTCP1          | AT1G63060 | -      | 0    | 0   | 4,17                                  | protein coding, 0                                                  |
| laTCP1          | AT4G28280 | -      | 0    | 0   | 7,26                                  | LORELEI-like-GPI anchored protein 3                                |
| CYC             | AT5G61420 | 0      | 0    | -   | 2,35                                  | myb domain protein 28                                              |
| CYC             | AT4G32980 | 0      | 0    | -   | 2,67                                  | homeobox gene 1                                                    |
| CYC             | AT4G14550 | 0      | 0    | +   | 2,24                                  | indole-3-acetic acid inducible 14                                  |
| CYC             | AT5G06530 | 0      | 0    | +   | 20,83                                 | Arabidopsis thaliana ATP-binding cassette G22                      |
| laTCP1 TCP1     | AT2G24450 | -      | -    | 0   | 4,79                                  | FASCICLIN-like arabinogalactan protein 3 precursor                 |
| laTCP1 TCP1     | AT3G62710 | -      | -    | 0   | 2,81                                  | Glycosyl hydrolase family protein                                  |
| laTCP1 TCP1     | AT3G07820 | -      | -    | 0   | 5,02                                  | <b>Pectin lyase-like superfamily protein</b>                       |
| laTCP1 TCP1     | AT5G15110 | -      | -    | 0   | 7,15                                  | <b>Pectate lyase family protein</b>                                |
| laTCP1 TCP1     | AT3G17060 | -      | -    | 0   | 5,51                                  | <b>Pectin lyase-like superfamily protein</b>                       |
| laTCP1 TCP1     | AT2G36020 | -      | -    | 0   | 4,92                                  | HVA22-like protein J                                               |
| laTCP1 TCP1     | AT1G29140 | -      | -    | 0   | 3,36                                  | Pollen Ole e 1 allergen and extensin family protein                |
| laTCP1 TCP1     | AT5G45880 | -      | -    | 0   | 5,01                                  | Pollen Ole e 1 allergen and extensin family protein                |
| laTCP1 TCP1     | AT5G19580 | -      | -    | 0   | 5,54                                  | glyoxal oxidase-related protein                                    |
| laTCP1 TCP1     | AT1G10770 | -      | -    | 0   | 4,99                                  | <b>Plant invertase/pectin methylesterase inhibitor superfamily</b> |
| laTCP1 TCP1     | AT3G62180 | -      | -    | 0   | 6,17                                  | <b>Plant invertase/pectin methylesterase inhibitor superfamily</b> |
| laTCP1 TCP1     | AT4G02250 | -      | -    | 0   | 4,02                                  | <b>Plant invertase/pectin methylesterase inhibitor superfamily</b> |
| laTCP1 TCP1     | AT4G36490 | -      | -    | 0   | 2,21                                  | ATSFH12, SEC14-like 12                                             |
| laTCP1 TCP1     | AT3G61160 | -      | -    | 0   | 4,02                                  | Protein kinase superfamily protein                                 |
| laTCP1 TCP1     | AT2G26410 | -      | -    | 0   | 4,86                                  | IQ domain 4                                                        |
| laTCP1 TCP1     | AT2G31500 | -      | -    | 0   | 2,02                                  | calcium-dependent protein kinase 24                                |
| laTCP1 TCP1     | AT4G00350 | -      | -    | 0   | 5,37                                  | MATE efflux family protein                                         |
| laTCP1 TCP1     | AT3G17980 | -      | -    | 0   | 4,69                                  | Calcium-dependent lipid-binding (CaLB domain) family               |
| laTCP1 TCP1     | AT1G68110 | -      | -    | 0   | 2,02                                  | ENTH/ANTH/VHS superfamily protein                                  |
| laTCP1 TCP1     | AT1G13970 | -      | -    | 0   | 2,64                                  | Protein of unknown function (DUF1336)                              |
| laTCP1 TCP1     | AT1G79910 | -      | -    | 0   | 3,40                                  | Regulator of Vps4 activity in the MVB pathway protein              |
| laTCP1 TCP1     | AT2G27180 | -      | -    | 0   | 5,13                                  | protein coding                                                     |
| laTCP1 TCP1     | AT3G60780 | -      | -    | 0   | 14,01                                 | Protein of unknown function (DUF1442)                              |
| laTCP1 TCP1     | AT5G39880 | -      | -    | 0   | 6,19                                  | unknown function                                                   |
| laTCP1 TCP1     | AT5G50830 | -      | -    | 0   | 4,98                                  | protein coding                                                     |
| laTCP1 TCP1     | AT5G04180 | -      | -    | 0   | 5,76                                  | alpha carbonic anhydrase 3                                         |
| laTCP1 TCP1 CYC | AT3G11480 | +      | +    | +   | 3,33                                  | S-adenosyl-L-methionine-dependent methyltransferase                |
| laTCP1 TCP1 CYC | AT1G29660 | +      | +    | +   | 2,06                                  | GDSL-like Lipase/Acylhydrolase superfamily protein                 |

|                 |           |   |   |   |      |                                                                    |
|-----------------|-----------|---|---|---|------|--------------------------------------------------------------------|
| laTCP1 TCP1 CYC | AT4G19690 | - | - | - | 2,40 | iron-regulated transporter 1                                       |
| laTCP1 TCP1 CYC | AT4G19380 | - | - | - | 2,52 | Long-chain fatty alcohol dehydrogenase family protein              |
| laTCP1 TCP1 CYC | AT5G42680 | + | + | + | 3,61 | Protein of unknown function, DUF617                                |
| laTCP1 CYC      | AT1G77760 | - | 0 | - | 2,50 | nitrate reductase 1                                                |
| laTCP1 CYC      | AT1G62770 | - | 0 | - | 4,25 | <b>Plant invertase/pectin methylesterase inhibitor superfamily</b> |
