# Supplementary material for: Differential transcriptome analysis reveals insight into monosymmetric corolla development of the crucifer Iberis amara
Source: PubMed Central journal article supplement (PMC4245847; doi:10.1186/s12870-014-0285-4), 2014-11-19
Supplement: 12870_2014_285_MOESM8_ESM.pdf [file 12870_2014_285_MOESM8_ESM.pdf]

| Accession                                                   | Sequence 5'-3'                  | Gene                                       |
|-------------------------------------------------------------|---------------------------------|--------------------------------------------|
| qPCR for confirmation of RNAseq data                        |                                 |                                            |
| <i>Iberis amara</i>                                         |                                 |                                            |
| EU145777 fwd                                                | CTGTGGCAAGATTCGGTTTT            | IaRAN3 (At5g55190)                         |
| EU145777 rev                                                | TACCTGCTTGCCTTCACTT             | IaRAN3 (At5g55190)                         |
| EU145779 fwd                                                | GGATCCACCAAGGGGCTCA             | IaTCP1 (At1G67260)                         |
| EU145779 rev                                                | GCTGCTACAACCATGATCCA            | IaTCP1 (At1G67260)                         |
| Contig8362 fwd                                              | AAACCATCGTGATCGGACTC            | Phosphoribulokinase (At1G32060)            |
| Contig8362 rev                                              | ATTAGCACGTGGGTCCAAAG            | Phosphoribulokinase (At1G32060)            |
| Contig20004 fwd                                             | AGCCATGTCAAAAGCGTAGC            | Pectate lyase family (At5G15110)           |
| Contig20004 rev                                             | GGAATCAGACCGCAATACA             | Pectate lyase family (At5G15110)           |
| Contig17630 fwd                                             | CCGAAAGAAGAAGATGTTAGTGGT        | Polygalacturonase 4 (At1G02790)            |
| Contig17630 rev                                             | CATCCACAACCTTACTGGATCA          | Polygalacturonase 4 (At1G02790)            |
| Contig12149 fwd                                             | GGTCTCGCTTTGGTCAATCC            | Invertase/pectinmethylesterase (At2G26450) |
| Contig12149 rev                                             | TCCTCTTTTGGCTCTCCAC             | Invertase/pectinmethylesterase (At2G26450) |
| Contig16003 fwd                                             | TGAGAATGTAAAAGTAACGTGGT         | VGD 1 homolog 2 (At3G62170)                |
| Contig16003 rev                                             | CAAACGTGCATCCCAAAAA             | VGD 1 homolog 2 (At3G62170)                |
| Contig5537 fwd                                              | GATGGGAAACTCGCAAATGT            | Glycosyl hydrolase 9A4 (At3G43860)         |
| Contig5537 rev                                              | GAGTCGATTCCTGCGAGAAG            | Glycosyl hydrolase 9A4 (At3G43860)         |
| Contig16048 fwd                                             | TCATCAAACCTATGAACATTACGTC       | Petal loss (At5G03680)                     |
| Contig16048 rev                                             | GAATTACCATCATTCCTCTCTGA         | Petal loss (At5G03680)                     |
| Contig3540 fwd                                              | CCTCAAGAGATTATATTCAGGAAA        | Rcd1-like (At5G12980)                      |
| Contig3540 rev                                              | TCACTTATTTCAATTGCAACATCC        | Rcd1-like (At5G12980)                      |
| Contig7820 fwd                                              | CATGAGAGCTCGATTGACACA           | Unknown protein (At5G42680)                |
| Contig7820 rev                                              | CCGTAATAAGGACGTCAAGAAGA         | Unknown protein (At5G42680)                |
| Contig30658 fwd                                             | CTCCTCCTCGTTCATCAG              | Cytokinin oxidase 3 (At5G56970)            |
| Contig30658 rev                                             | CCACAACCTCCGCTTTAGCC            | Cytokinin oxidase 3 (At5G56970)            |
| Contig11132 fwd                                             | TCATCGCTTTTATGACAGTA            | P-glycoprotein 13 (At1G27940)              |
| Contig11132 rev                                             | CACTCTTTTTGAGATTGTG             | P-glycoprotein 13 (At1G27940)              |
| Contig18979 fwd                                             | CGATAAGGACACCGGAAAGT            | COBL10 (At3G20580)                         |
| Contig18979 rev                                             | ATGTTGAGGTGCGTGATAG             | COBL10 (At3G20580)                         |
| Contig7844 fwd                                              | GCACAACACACATGACATCG            | RALF15 (At2G22055)                         |
| Contig7844 rev                                              | GATGTGTTAAACATTTGGGAAAA         | RALF15 (At2G22055)                         |
| Contig6640 fwd                                              | AGAAAAAACACACAATGGGT            | RALF19 (At2G33775)                         |
| Contig6640 rev                                              | AACACAAGATTTAGTCAATGTCCAC       | RALF19 (At2G33775)                         |
| Semiquantitative RT PCR for confirmation of microarray data |                                 |                                            |
| <i>Arabidopsis thaliana</i>                                 |                                 |                                            |
| At5G55190 fwd                                               | ACCAGCAAACCGTGGATTACCTAGC       | ATRN3                                      |
| At5G55190 rev                                               | ATTCCACAAGTGAAGATTAGCGTCC       | ATRN3                                      |
| At3G66656 fwd                                               | GTGAAACATCAGGCTATAGTAGAGG       | AGL91                                      |
| At3G66656 rev                                               | GCTTATTTCTTAATCTTAGC            | AGL91                                      |
| At1G01010 fwd                                               | GGAGGATCAAGTTGGGTTTGG           | ANAC001                                    |
| At1G01010 rev                                               | GGAGATGAACAACAAGACACC           | ANAC001                                    |
| At1G73830 fwd                                               | GCAACACGCTTCATCTTTCC            | BEE3                                       |
| At1G73830 rev                                               | CCATTTATGGAACTTGAGC             | BEE3                                       |
| At2G26150 fwd                                               | GCTTCTCATCTGTAGGATCC            | HSFA2                                      |
| At2G26150 rev                                               | GGTTCCGAACCAAGAAAACC            | HSFA2                                      |
| At1G74660 fwd                                               | GCAGAGATCAAGAACTCC              | MIF1                                       |
| At1G74660 rev                                               | CGTTAGGTGGAGAATACTCAC           | MIF1                                       |
| At5G61590 fwd                                               | CAACAACGTCACCTGAGG              | AP2-domain protein                         |
| At5G61590 rev                                               | CCTTGAGGCTGTGGTACATCG           | AP2-domain protein                         |
| At5G61420 fwd                                               | CCAAGGTCTCCGAGCTTAGC            | MYB28                                      |
| At5G61420 rev                                               | CCTCATTGTGGTTATCTCTCC           | MYB28                                      |
| At5G06710 fwd                                               | CCACCATTACAGCTTCACTTCACTCC      | HAT14                                      |
| At5G06710 rev                                               | GCTGTCTTCAAGAAAAGCAGATTGG       | HAT14                                      |
| At1G69560 fwd                                               | CCAATCATTAAACCCTAATCC           | MYB105                                     |
| At1G69560 rev                                               | GGTTTGGTTTAAAGAAATCG            | MYB105                                     |
| At1G35490 fwd                                               | GGAAATTCGGATTCATTGG             | bZIP                                       |
| At1G35490 rev                                               | GGTTGATATTTGTGTATCG             | bZIP                                       |
| At3G06490 fwd                                               | GGATTCAAGTCAAGCTCGGCCTCATCC     | MYB108                                     |
| At3G06490 rev                                               | CCATTTGACCCGAATAGTATTCC         | MYB108                                     |
| At2G25890 fwd                                               | CCAATAATGAGGAGTCTCC             | Glycin rich protein                        |
| At2G25890 rev                                               | GCTCCCATCGGGTGTCTTCC            | Glycin rich protein                        |
| At2G18660 fwd                                               | CCAATCGCTGAAGCTGCTCAAGG         | EXBL3                                      |
| At2G18660 rev                                               | GTGTATACGACACGAATGTACC          | EXBL3                                      |
| At4G14365 fwd                                               | CCATGAGGCAGAGAAGAGAAAGC         | Zinc finger                                |
| At4G14365 rev                                               | GACATGGGCACAGAGTCAAAGC          | Zinc finger                                |
| At1G26800 fwd                                               | CCAAGGCTTCCATCGATGCG            | Zinc finger                                |
| At1G26800 rev                                               | CCATCACTGTTCCACCGTCC            | Zinc finger                                |
| At1G13260 fwd                                               | CGTTGTTAACGTGCGGGTTGAGTAATGATGG | RAV1                                       |
| At1G13260 rev                                               | CGTTTCTGAACCTCCGGTGAATGTTAACTC  | RAV1                                       |

|               |                              |                                           |
|---------------|------------------------------|-------------------------------------------|
| At1G66230 fwd | CCTTTCAAGAAACAATGGAGCGTCC    | MYB20                                     |
| At1G66230 rev | GTTCTCTATAATGTTGTCCACACC     | MYB20                                     |
| At4G23140 fwd | CCTTAAATCTTTGTCCCAAGG        | CRK6                                      |
| At4G23140 rev | CCAACGACTCCCTCGGTGGTGGG      | CRK6                                      |
| At4G26150 fwd | GGAAAGACAGAATGGTTATAACAACG   | CGA1                                      |
| At4G26150 rev | GCTCTGGGTCTCCAAATCCTCG       | CGA1                                      |
| At5G66815 fwd | GGTCAAAAGAAAACATTGTACG       | Unknown protein                           |
| At5G66815 rev | GGATAAACTATGGCCAATGC         | Unknown protein                           |
| At1G20190 fwd | CTCTAGCTGAGATTGGCGGTTTTGGC   | EXLB11                                    |
| At1G20190 rev | CCGATCTTTTCCAAGCGGG          | EXLB11                                    |
| At3G07830 fwd | GGACATGAACAGGACGCTCAGC       | Putative polygalacturonase                |
| At3G07830 rev | GGGTCAGCACGGTGGTGTGT         | Putative polygalacturonase                |
| At1G70720 fwd | CCACCTTTCTCCACAAATCC         | invertase/pectin methylesterase inhibitor |
| At1G70720 rev | CGTCATCTTTGATAGAGTCG         | invertase/pectin methylesterase inhibitor |
| At1G29140 fwd | CCCTCGTTCACCTCACCGCA         | Pollen Ole e 1 allergen and extensin      |
| At1G29140 rev | GGCATTACGCGAGAGGAGTCTCC      | Pollen Ole e 1 allergen and extensin      |
| At3G62180 fwd | GGCTAAACCAGTCAAACGAAACG      | invertase/pectin methylesterase inhibitor |
| At3G62180 rev | GTAATAATAATCAGACAAGGGTG      | invertase/pectin methylesterase inhibitor |
| At5G07430 fwd | CAATGTCGGTGGTTGCATTCC        | Pectin lyase like superfamily protein     |
| At5G07430 rev | ATCCGCGGTTGAGGTTCTCCC        | Pectin lyase like superfamily protein     |
| At5G56870 fwd | ATGGTATTGAACCTTAGAG          | BGAL4                                     |
| At5G56870 rev | CGCTGCAGAGTTCTCATCTTTGTTC    | BGAL4                                     |
| At3G17060 fwd | CGCATCAGCAATGCAAAAGAC        | Pectin lyase like superfamily protein     |
| At3G17060 rev | GGGTCGAGCCATGGTAACTCC        | Pectin lyase like superfamily protein     |
| At1G47960 fwd | GAGACACCAGACTTCAATC          | VIF1, pectinesterase                      |
| At1G47960 rev | GTTGCTTCGACACGGCGTC          | VIF1, pectinesterase                      |
| At4G30140 fwd | GGTGGCACCAGCGGTGCATGG        | GDSL-motif lipase                         |
| At4G30140 rev | GAACATAGCTCCCGTTTGTGG        | GDSL-motif lipase                         |
| At3G50660 fwd | CGCTTAACTTCTTAAGTCACGCACG    | DWF4                                      |
| At3G50660 rev | CGAGAAACCCTAATAGCAAACC       | DWF4                                      |
| At2G16910 fwd | GGACAGAACTCATAGCGGAGAATGG    | AMS                                       |
| At2G16910 rev | GGTTGTGGTAATGGTTGATGTTGG     | AMS                                       |
| At4G08950 fwd | CCTACGTCAAAACCTCCACC         | EXO                                       |
| At4G08950 rev | GCACCATACGCAATAAAACCTACC     | EXO                                       |
| At2G34870 fwd | GCTTCTTCATCACTCATCAGTGATGC   | MEE26                                     |
| At2G34870 rev | GGAACACCGCCAAATGG            | MEE26                                     |
| At5G57560 fwd | GCGATCACTTACTTACTTCC         | XTH22_TCH4                                |
| At5G57560 rev | GCCAGTAGTAGTCCCCTGTTTCGAGGC  | XTH22_TCH4                                |
| At1G68360 fwd | GGAACGTGGCGAGTTCCGG          | Zinc finger-like                          |
| At1G68360 rev | CGGCTGCGTTTCGTGTAGC          | Zinc finger-like                          |
| At3G20450 fwd | CGTGACAATCGAAGCCGTCC         | Unknown protein                           |
| At3G20450 rev | GGAAGCTTCGAGGAGG             | Unknown protein                           |
| At3G63010 fwd | CGTCTCTCCTCATCAGACCCGTCACG   | ATGID 1B hydrolase                        |
| At3G63010 rev | GGAGTAAGAAGCACAGGACTTGACTTGC | ATGID 1B hydrolase                        |
