# Supplementary material for: Differential transcriptome analysis reveals insight into monosymmetric corolla development of the crucifer Iberis amara
Source: PubMed Central journal article supplement (PMC4245847; doi:10.1186/s12870-014-0285-4), 2014-11-19
Supplement: 12870_2014_285_MOESM9_ESM.pdf [file 12870_2014_285_MOESM9_ESM.pdf]

| AGI Code               | Annotation                                                     | Affymetrix fold change | sqRT-PCR |
|------------------------|----------------------------------------------------------------|------------------------|----------|
| <b>laTCP1/TCP1</b>     |                                                                |                        |          |
| At3g63010              | ATGID1B (GA INSENSITIVE DWARF 1B); hydrolase                   | 2,68 / 2,14            | +        |
| At3g06490              | AtMYB108; transcription factor                                 | -4,20 / -2,87          | +        |
| At1g35490              | bZIP transcription factor family                               | -5,14 / -2,88          | +        |
| At1g70720              | Plant invertase/pectin methylesterase inhibitor superfamily    | -4,62 / -2,16          | +        |
| At3g07830              | Putative polygalacturonase/putative pectinase                  | -3,58 / -2,12          | +        |
| At5g56870              | BGAL4 (BETA- GALACTOSIDASE 4)                                  | -3,10 / -2,60          | +        |
| At1g29140              | Pollen Ole e 1 allergen and extensin family protein            | -5,98 / -2,89          | +        |
| At3g17060              | Pectin lyase like superfamily protein                          | -2,87 / -2,24          | +        |
| <b>laTCP1</b>          |                                                                |                        |          |
| At2g18660              | EXLB3 (EXPANSIN-LIKE B3 PRECURSOR)                             | 6,70                   | +        |
| At4g14365              | Zinc finger (C3HC4-Typ) protein                                | 4,62                   | +        |
| At3g66656              | AGL91; transcription factor                                    | 5,24                   | +        |
| At4g26150              | CGA1; CYTOKININ-RESPONSIVE GATA FACTOR 1; transcription factor | 2,25                   | +        |
| At2g25890              | Glycine-rich protein/oleosin                                   | -2,90                  | +        |
| At1g73830              | BEE3 (BR ENHANCED EXPRESSION 3); transcription factor          | -2,81                  | +        |
| At1g47960              | Vif1; pectinesterase/pectinesterase inhibitor                  | -2,89                  | +        |
| At1g20190              | ATEXP11 (ARABIDOPSIS THALIANA EXPANSIN 11), expansin           | -5,00                  | +        |
| At4g30140              | GDSL-motiv lipase/hydrolase                                    | -2,98                  | +        |
| <b>CYC</b>             |                                                                |                        |          |
| At1g74660              | MIF1 (MINI ZINC FINGER 1); transcription factor                | 7,91                   | +        |
| At5g61590              | TF, protein family with AP2-domain                             | 7,21                   | +        |
| At1g66230              | AtMYB20; transcription factor                                  | 2,72                   | +        |
| At1g69560              | AtMYB105; transcription factor                                 | -2,46                  | +        |
| At5g06710              | HAT14 (HOMEBOX of A. THALIANA); transcription factor           | -2,46                  | +        |
| At1g68360              | Zinc finger-like protein                                       | -2,43                  | +        |
| At3g20450              | Unknown protein                                                | -3,93                  | +        |
| At5g61420              | AtMYB28; transcription factor                                  | -4,23                  | +        |
| At5g57560              | XTH22_TCH4 (TOUCH 4); hydrolase                                | 24,00                  | +        |
| At2g16910              | AMS (ABORTED MICROSPORES); transcription factor                | -3,50                  | +        |
| <b>laTCP1/TCP1/CYC</b> |                                                                |                        |          |
| At3g50660              | DWF4 (DWARF 4); steroid 22-alpha hydroxylase                   | 3,27 / 4,53 / 2,76     | +(+TCP1) |
